# Supplementary material
Source: Elsevier journal article supplement (https://www.sciencedirect.com/science/article/pii/S1658361214000390)
Supplement: 1-s2.0-S1658361214000390-main.pdf [file 1-s2.0-S1658361214000390-main.pdf]

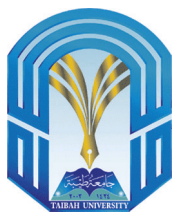

# Taibah University

## Journal of Taibah University Medical Sciences

www.sciencedirect.com

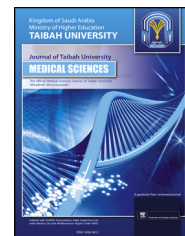

Original Article

## Knowledge, attitudes and practice with regard to the articles of the Framework Convention on Tobacco Control among Egyptian adults

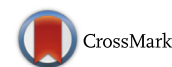

Aisha Abulfoutoh, MD<sup>a</sup>, Eman El Tahlawy, MD<sup>b</sup>, Tamer Hifnawy, MD<sup>c,d,\*</sup>, Neven Scharaf, MD<sup>b</sup>, Mohamed Momen, MD<sup>a</sup> and Aya Mostafa Kamal, MD<sup>a</sup>

<sup>a</sup> Public Health Department, Ain Shams University, Cairo, Egypt

<sup>b</sup> Environmental Health Department, National Research Centre, Cairo, Egypt

<sup>c</sup> Public Health Department, Faculty of Medicine, Beni Suef University, Beni Suef, Egypt

<sup>d</sup> College of Dentistry, Taibah University, Almadinah Almunawwarah, Kingdom of Saudi Arabia

Received 13 January 2014; revised 12 April 2014; accepted 14 April 2014

Available online 11 July 2014

### المخلص

**أهداف البحث:** وقعت مصر على اتفاقية نظام مكافحة التبغ في عام 2003م وتم التصديق عليها في فبراير 2005م من قبل البرلمان المصري. وعلى الرغم من وجود معظم بنود نظام الاتفاقية في القوانين والأنظمة المصرية، إلا أنه نادراً ما يتم تنفيذ هذه الأنظمة لعدة أسباب وعقبات. تهدف هذه الدراسة إلى تقييم المعرفة والسلوك والممارسة تجاه اتفاقية نظام مكافحة التبغ بين البالغين في مصر.

**طرق البحث:** استخدمت الدراسة المستعرضة الحالية استبانة للمقابلة الشخصية شملت المعرفة والسلوك والممارسة فيما يتعلق بنظام الاتفاقية في محافظتين في مصر.

**النتائج:** معدل انتشار التدخين يتفاوت بين الفئات السكانية. حيث كان التدخين أعلى بين الرجال 97% بالمقارنة بالنساء 3%. وبين البالغين الذين تقل أعمارهم عن 55 عاماً. تنخفض حالة التدخين مع التقدم في العمر. يعرف معظم المدخنين (74%) بأن التدخين غير مسموح للأطفال والشباب، وأنه يحتوي على القطران والنيكوتين، اللذان يشكلان خطراً على الصحة. يتجاهل نصف المدخنين وجود علامات التحذير على العلب. يعلم غالبية المدخنين (66.8%, 67.8%, 64.3%). 83.9% على التوالي أن الإعلان عن السجائر غير مسموح، وأنه ليس هناك مساعدة من وسائل الإعلام للوقاية من التدخين. وأنها لا تعطي ما يكفي من

المعلومات حول مخاطره، وعدم وجود حملة إعلامية ضد التدخين. يعتقد غالبية المدخنين (62.2%) بعدم وجود استراتيجية فاعلة ضد التدخين، و77.3% بعدم وجود سياسة حكومية ضد التدخين. كما يعتقد نصف المدخنين (50.4%) بعدم وجود المهتمين في المجتمع للعمل على منع التدخين، وأن العاملين في الخدمات الطبية هم الذين باستطاعتهم وضع سياسات منع التدخين، وأخيراً استنتج 70.7% بأنه لم يتم القيام بالكثير من الجهود لمنع التدخين.

**الاستنتاجات:** يمكن أن تستخدم البيانات في هذه الدراسة كمقياس أساسي للتقييم المستقبلي لبرامج مكافحة التبغ التي تنفذها وزارة الصحة في الحكومة المصرية.

**الكلمات المفتاحية:** اتفاقية نظام مكافحة التبغ; البالغين; المدخنين; مصر

### Abstract

**Objectives:** Egypt signed the Framework Convention on Tobacco Control (FCTC) in 2003, and it was ratified by the Egyptian Parliament in February 2005. Although most of the articles of the FCTC are reflected in Egyptian law and regulations, enforcement is rare for many reasons. The aim of the study was to evaluate knowledge, attitudes and practice toward the FCTC among Egyptian adults.

**Methods:** Cross-sectional survey with an interview questionnaire about knowledge, attitudes and practice as regards the FCTC among 2941 people from them 1584 smokers (97% men, 3% women) in two governorates of Egypt.

**Results:** The prevalence of smoking varied, being higher among men (97%) than women (3%) and was higher

\* Corresponding address: College of Dentistry, Taibah University, Almadinah Almunawwarah, P.O. Box 2898, Kingdom of Saudi Arabia.

E-mails: tamer.hifnawy@med.bsu.edu.eg, thifnawy@yahoo.com (T. Hifnawy)

Peer review under responsibility of Taibah University.

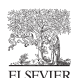

Production and hosting by Elsevier

among adults under the age of 55 years. Most smokers (74%) knew that smoking by children and adolescents was not allowed, and that tobacco contains tar and nicotine, which are hazardous to health. Half of the smokers were unaware of the presence of warning signs on boxes. Most smokers knew that advertising of cigarettes is not allowed (66.8%), the media do not advocate for smoking prevention (67.8%), not enough information is given about its hazards (64.3%), and there is no media campaign against smoking (83.9%).

Most smokers (62.2%) considered that there is no active strategy against smoking, and 77.3% said that there was no Government policy against smoking. Half the smokers (50.4%) thought that people in the community were not interested in smoking prevention, and medical personnel should help; 70.7% concluded that little was being done to prevent smoking.

**Conclusion:** The data from this study could be used as a baseline for future evaluations of tobacco control programmes implemented by the Ministry of Health of Egypt.

**Keywords:** Adults; Egypt; FCTC; Smokers

© 2014 Taibah University. Production and hosting by Elsevier Ltd. All rights reserved.

## Introduction

Tobacco use is one of the major public health disasters of the past and present century. There are more than 1.25 billion smokers in the world today, representing about one third of the world's population over 15 years of age. Cigarette smoking is one of the main causes of preventable death worldwide and the leading cause of preventable death in industrialized countries; however, the epidemic of disease and death is rapidly shifting to developing and transitional market economies. At current levels of tobacco consumption, the epidemic is expected to kill about 10 million people per year by 2020, with two thirds of these deaths occurring in developing countries.<sup>1</sup>

The WHO Framework Convention on Tobacco Control (FCTC) is designed to strengthen national and international coordination to combat the tobacco epidemic. Formally negotiated by WHO Member States over a period of 4 years, the treaty incorporates a variety of measures to encourage State Parties to curb the growth of tobacco production and use. Some measures constitute concrete obligations, while other measures are framed as goals or recommendations.<sup>2</sup> Recognizing that price and tax measures are effective in reducing tobacco consumption, particularly among young people, the treaty calls for enacting and implementing tax and price policies on tobacco products that will contribute to reducing tobacco consumption. Similarly, the treaty calls for testing, measuring and regulating the content and emissions of tobacco products and for effective legislative, executive and administrative measures requiring manufacturers and importers to disclose to governmental authorities the contents and emissions of tobacco and for governments to provide public disclosure of the toxic

constituents and emissions of tobacco products.<sup>3</sup> The FCTC was designed as a dynamic, incremental approach to international tobacco control, modelled on the framework convention – protocol approach that has been used with some success, particularly in environmental law.<sup>4</sup>

Egypt has the highest tobacco consumption in the Arab world, with a total consumption of 61.8 billion cigarettes in 2003, which was a marked increase from 12 billion in 1970. While population growth in Egypt only doubled, the reported fivefold rate of increase in tobacco consumption reflects a marked increase in the number of smokers and probably in the amount of tobacco consumed by smokers.<sup>5</sup> In a national survey in 2004 of a representative sample of 6871 individuals over the age of 20 years (3040 men and 3831 women), the prevalence of smoking in Egypt was estimated to be 47% among adult males, peaking at 55% among those aged 50–60 years.<sup>6</sup> The age at initiation was shown to be 11 years in a school survey in rural Egypt in 2002, whereas previous studies had shown initiation at later ages.<sup>7</sup> The number of smokers is estimated to increase by 8% annually and is expected to continue to increase over the next 20 years.<sup>6</sup> The death rate due to smoking is increasing, mainly from cancer-related illness. A study by the Egyptian Smoking Prevention Research Institute showed that the number of deaths attributable to smoking increased from 23,000 in 1999 to 34,000 in 2004 (Figures 1–3).

Egypt has many laws regulating the tobacco industry and consumption, mainly focussing on banning advertising and smoking in enclosed public places. Advertising is banned in all forms of public media (newspapers, television and radio), and a maximum tar level of 15 mg per cigarette has been set for the cigarette industry. The specific laws and regulations issued for tobacco control in Egypt include:

- Law 52/1981, which forbids smoking in public places and on public transport, and sets a maximum of 15 mg of tar per cigarette;
- Law 137/1981, which forbids smoking in work places;
- Law 4/1994, which prohibits smoking in enclosed public places and introduces a fine (LE 10) for smoking on public transport; and
- Ministerial decree 344/1997, which was promulgated in order to convene a steering committee for a national programme on smoking control. The committee comprises representatives from the ministries of health, information, education, social labour, awqaf (religious affairs), tourism, internal affairs and environmental

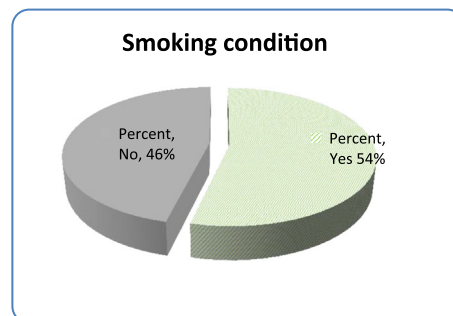

We found the current smoker constitute 53.8% form the studied group

**Figure 1:** Smoking distribution among studied group.

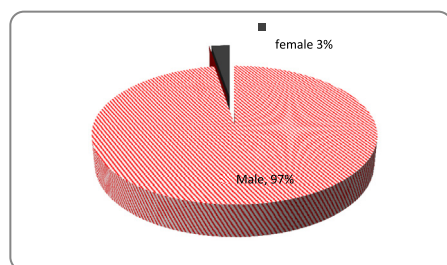

The majority of the smokers were males constitute 97.4% and only 2.6 % were females

**Figure 2:** Sex distribution among smokers.

affairs, as well as the high assembly of youth, sports and nongovernmental organizations working in the field. The main responsibilities of the committee are to develop a national programme for smoking control, define interventions and activities and identify the role of each participating ministry and agency.

Egypt's anti-smoking legislation is not, however, adequate to make a noticeable difference, especially as most smokers are unaware of these regulations. Enforcement is therefore the main obstacle to success in controlling tobacco.

The WHO FCTC was adopted by the Fifty-sixth World Health Assembly in May 2003 and became international law on 27 February 2005.<sup>8</sup> The Convention is the driving force behind the global response to the pandemic of tobacco-induced death and disease. It implies coordinated, effective, urgent action to curb tobacco consumption, laying out cost-effective tobacco control strategies for public policies, such as bans on direct and indirect tobacco advertising, tobacco tax and price increases, promoting smoke-free public places and work places and prominent health messages on tobacco packaging. One important feature of the WHO FCTC is the call for countries to establish programmes for national, regional and global surveillance.

Egypt signed the FCTC in 2003, and it was ratified in February 2005 by the Egyptian Parliament. Although most of the articles of the FCTC are reflected in Egyptian laws and regulations, they are seldom enforced, for many reasons. One important obstacle is the absence of a well-defined policy for national implementation; another is cultural factors, as smoking is considered socially acceptable, unlike in western countries. Quantification of the magnitude and seriousness of exposure of non-smokers to second-hand smoke should help to change social acceptance of tobacco use and apathy about implementing the existing regulations.

The aim of the study was to evaluate the knowledge, attitudes and practice of Egyptian adults to the FCTC and to determine differences according to smoking status.

## Materials and Methods

### Type of study

A cross-sectional survey with an interview questionnaire about knowledge, attitudes and practice as regards the FCTC was conducted in two governorates of Egypt, Cairo representing an urban population and Qualiobia a rural

population. Eligible participants were adults over the age of 18 years, who were interviewed in public places (hospitals, schools, universities, public transport and public recreational places) with a questionnaire. A total of 2941 people from them 1584 smokers (97% men, 3% women).

### Instrument

The 33-item questionnaire was designed to assess personal and demographic characteristics; attitudes, values and beliefs about tobacco control policy in society and roles in helping people to stop smoking; and knowledge about quitting tobacco use and methods available for quitting.

### Statistical analysis

The data were tabulated with SPSS version 19. A chi-squared test was used to test significance.

### Ethical considerations

This study was approved by the National Liver Institute Research Ethics Committee, Cairo, Egypt.

## Results and discussion

More than half the population were smokers (53.8%). The prevalence among men was 97% and was higher among adults under the age of 45 years, the prevalence increasing with decreasing age.

Table 1 shows that most smokers (82%) considered that the hazards of smoking should be taught at school, 74.4% knew that children and adolescents are not allowed to smoke, 3.7% did not know whether children and adolescents were allowed to sell or buy cigarettes, and 6.5% did not know whether the bans on smoking and selling and buying cigarettes by children and adolescents were always respected.

Smoking rates in the United States dropped by half between 1965 and 2006, falling from 42% to 20.8% of adults. Current smoking was more prevalent among men (23.9%) than women (18.1%).<sup>9</sup> In Canada, the prevalence of current smoking declined between 1985 and 2001 for both sexes and all age groups except for those aged 15–24 years. Even larger decreases were seen between 1991 and 2001, while current smoking by adolescents did not significantly change between 1985 and 1994–1995.<sup>10</sup> The first study on smoking habits in Sweden was performed in 1946, when 50% of men and 9% of women were smokers; in 1977, 32% of women and 41% of men were smokers.<sup>8</sup> In Algeria, the smoking rate for men was  $29.9 \pm 2.5$ , while that for women was  $0.3 \pm 0.2$ .

In general, smoking may be up to five times more prevalent among men than women in some communities, although the gender gap usually declines with younger age. In some developed countries, smoking rates for men have peaked and begun to decline, while for women they continue to climb.<sup>11</sup>

In this study, the majority of smokers reported that they had been taught about the hazards of smoking at school (82.4%) and that smoking by children and adolescents

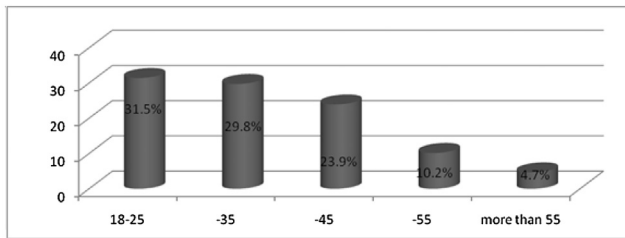

The Figure shows that the smoking status decreases with increase age

**Figure 3:** Age group distribution among smokers.

(74.4%) and selling the cigarettes (74.5%) were not allowed. This finding reflects a strong negative association between what was taught at school and current smoking, especially among smokers. Although most of the smokers knew about the prohibition on smoking and selling cigarettes to children and adolescents, they knew that the bans were not respected and considered that the regulations should be applied. A similar result was obtained by Sinha et al. in India.<sup>9</sup>

Smokers were statistically significantly more aware (50.9%) than non-smokers (49.1%) about health warnings on cigarette packs. Thus, the desire to smoke is stronger than an attempt to stop them from smoking, especially after they have bought the cigarettes. This was confirmed by their awareness about the percentages of tar and nicotine written on the box and the benefits of decreasing them. The percentages of smokers who were aware of these warnings (73.9%, 77.2%) were significantly higher than those of non-smokers (26.1%, 22.8%).

Smokers in our study, and, to a lesser extent, non-smokers had a negative view and a poor evaluation of the anti-smoking role of the media. The effectiveness of media interventions in preventing young people from starting to smoke, reducing smoking among adults and motivating smokers to give up by not advertising cigarettes and creating a negative impression about smoking have been studied by many authors. There is evidence that tobacco control programmes that include mass media campaigns can be effective

in changing smoking behaviour and significantly reducing smoking prevalence.<sup>12,13</sup> This was not seen in our study, as Egypt's anti-smoking media campaign lacks effectiveness and has no real support from the Government. Advertising should be used routinely as an essential component of any population smoking reduction strategy.

Several studies provide evidence that increasing the price of cigarettes through excise taxes reduces smoking among adolescents and young adults, who are particularly price-sensitive.<sup>14–16</sup> In our study, most non-smokers (80.9%) agreed to increased taxes on cigarettes, while half the smokers (51%) disapproved of this intervention, perhaps indicating its importance and effectiveness. Van Walbeek found that an increase in tax is generally the most effective measure for tobacco control: in South Africa, a 10% increase in the real price of cigarettes decreased cigarette consumption by 6–8%.<sup>16</sup>

Most smokers (62.2%) agreed that there was no active strategy against smoking, 77.5% stated that there was no Government smoking prevention policy, and 70.7% assumed that nothing was being done to prevent smoking. These views present a challenge to Egypt's Government to develop, implement and evaluate its tobacco-control programme. If effective programmes are not implemented soon, future morbidity and mortality attributable to tobacco will probably increase.

Smoking is a major contributor to deaths from chronic disease. The findings from the Global Youth Tobacco Survey suggest that the number of deaths from smoking will double by 2020 (from 5 to about 10 million), but this might be an underestimate because of, high levels of exposure to second-hand smoke and indirect pro-tobacco advertising.<sup>17</sup> Synergy in the community at all levels, specially with health personnel, will be needed to develop, implement and evaluate a comprehensive tobacco-control policy that will improve our future health. Our study shows that both smokers (50.3%) and non-smokers (44.5%) consider that no one in the community is working on smoking prevention, although more than half of all participants found that

**Table 1: Knowledge about smoking hazards and prevention among kids.**

|                                                                                           |               | Smoking condition |       |      |       | <i>P</i> value |
|-------------------------------------------------------------------------------------------|---------------|-------------------|-------|------|-------|----------------|
|                                                                                           |               | Yes               |       | No   |       |                |
|                                                                                           |               | No                | %     | No   | %     |                |
| Smoking hazards teach as part of curriculum                                               | Yes           | 1305              | 82.4% | 972  | 71.6% | 0.000          |
|                                                                                           | No            | 158               | 10.0% | 210  | 15.5% |                |
|                                                                                           | I do not know | 121               | 7.6%  | 175  | 12.9% |                |
| Smoking was not allowed for kids and youth                                                | Yes           | 1178              | 74.4% | 809  | 59.5% | 0.000          |
|                                                                                           | No            | 310               | 19.6% | 372  | 27.4% |                |
|                                                                                           | I do not know | 95                | 6.0%  | 178  | 13.1% |                |
| Sailing cigarettes was not sold for kid and youth                                         | Yes           | 1179              | 74.5% | 782  | 57.5% | 0.000          |
|                                                                                           | No            | 346               | 21.9% | 445  | 32.7% |                |
|                                                                                           | I do not know | 58                | 3.7%  | 133  | 9.8%  |                |
| Those instructions (about sailing cigarettes and smoking cig, for kids) done all the time | Yes           | 66                | 4.2%  | 68   | 5.0%  | 0.000          |
|                                                                                           | No            | 1414              | 89.3% | 1138 | 83.7% |                |
|                                                                                           | I do not know | 103               | 6.5%  | 153  | 11.3% |                |

The majority of smokers think that smoking hazards teach as part of school curriculum about 82% of smokers, 74.4% they know that smoking was not allowed for kids and youth, 3.7% of smokers they do not know if the selling cigarettes or buying it not allowed or not, 6.5% of smokers they do not know if the selling cigarettes or buying and smoking it is not allowed or not.



**Table 2: Knowledge about smoking hazards.**

|                                                            |               | Smoking condition |       |     |       | P value |
|------------------------------------------------------------|---------------|-------------------|-------|-----|-------|---------|
|                                                            |               | Yes               |       | No  |       |         |
|                                                            |               | No                | %     | No  | %     |         |
| Health warning present in cigarettes box                   | Yes           | 751               | 50.9% | 724 | 49.1% | 0.000   |
|                                                            | No            | 791               | 61.0% | 505 | 39.0% |         |
|                                                            | I do not know | 43                | 25.0% | 129 | 75.0% |         |
| Percent of tar and nicotine in cigarettes                  | Yes           | 1288              | 73.9% | 454 | 26.1% | 0.000   |
|                                                            | No            | 214               | 23.6% | 691 | 76.4% |         |
|                                                            | I do not know | 83                | 27.9% | 214 | 72.1% |         |
| Benefits for decreasing tar and nicotine in the cigarettes | Yes           | 887               | 77.2% | 262 | 22.8% | 0.000   |
|                                                            | No            | 581               | 40.2% | 863 | 59.8% |         |
|                                                            | I do not know | 117               | 33.3% | 234 | 66.7% |         |

The majority of smokers do not know the presence of health warning in cigarettes box 61%. About 73.9% of smokers they know the Percent of tar and nicotine in cigarettes and benefits of decreasing tar and nicotine in the cigarettes.

**Table 3: Attitudes in the community to decrease smoking (media role).**

|                                                         |               | Smoking condition |       |     |       | P value |
|---------------------------------------------------------|---------------|-------------------|-------|-----|-------|---------|
|                                                         |               | Yes               |       | No  |       |         |
|                                                         |               | No                | %     | No  | %     |         |
| Advertising about cigarettes is not allowed for         | Yes           | 1058              | 66.8% | 661 | 48.7% | 0.000   |
|                                                         | No            | 363               | 22.9% | 478 | 35.2% |         |
|                                                         | I do not know | 164               | 10.3% | 218 | 16.1% |         |
| Media help the efforts for smoking prevention           | Yes           | 431               | 27.2% | 536 | 39.5% | 0.000   |
|                                                         | No            | 1072              | 67.8% | 645 | 47.5% |         |
|                                                         | I do not know | 79                | 5.0%  | 176 | 13.0% |         |
| Media gives enough information about hazards of smoking | Yes           | 478               | 30.3% | 481 | 35.4% | 0.000   |
|                                                         | No            | 1016              | 64.3% | 691 | 50.8% |         |
|                                                         | I do not know | 86                | 5.4%  | 187 | 13.8% |         |
| There is a public culture about smoking prevention      | Yes           | 224               | 14.1% | 314 | 23.1% | 0.000   |
|                                                         | No            | 1139              | 71.9% | 780 | 57.4% |         |
|                                                         | I do not know | 222               | 14.0% | 266 | 19.6% |         |
| Presence of media campaign against smoking all the time | Yes           | 160               | 10.1% | 232 | 17.1% | 0.000   |
|                                                         | No            | 1328              | 83.9% | 951 | 70.0% |         |
|                                                         | I do not know | 94                | 5.9%  | 175 | 12.9% |         |

The majority of smokers know the advertising for cigarettes is not allowed 66.8%, they think there is no media help in smoking prevention 67.8%, media not gives enough information about hazards of smoking 64.3%, with no public culture about smoking prevention 71.9% and there is no media campaign against smoking 83.9%.

medical personnel helped in preventing smoking. In a study in India,<sup>18</sup> there was a high prevalence of tobacco use and a general lack of training of health professionals in techniques for counselling patients in cessation.

In 2001, Egypt passed an act banning smoking in public places; however, this study shows that 82.3% of smokers and 77.8% of non-smokers were unaware of this law. Similar percentages of smokers and non-smokers (76.7% and 77.1%,

**Table 4: Practices in the community to decrease smoking (increase taxes).**

|                                                 |               | Smoking condition |       |      |       | P value |
|-------------------------------------------------|---------------|-------------------|-------|------|-------|---------|
|                                                 |               | Yes               |       | No   |       |         |
|                                                 |               | No                | %     | No   | %     |         |
| Increase taxes as method for smoking prevention | Yes           | 695               | 43.8% | 1100 | 80.9% | 0.000   |
|                                                 | No            | 808               | 51.0% | 162  | 11.9% |         |
|                                                 | I do not know | 82                | 5.2%  | 98   | 7.2%  |         |
| Use part of taxes to finance the health system  | Yes           | 1233              | 77.8% | 1199 | 88.2% | 0.000   |
|                                                 | No            | 283               | 17.9% | 78   | 5.7%  |         |
|                                                 | I do not know | 69                | 4.4%  | 82   | 6.0%  |         |

Only 43.8% of smokers agree about increase taxes as method for smoking prevention, majority of smokers agree that use these taxes for support the health system and there is no active strategy against smoking.

**Table 5: Governmental effort for stop smoking.**

|                                             |               | Smoking condition |       |     |       | <i>P</i> value |
|---------------------------------------------|---------------|-------------------|-------|-----|-------|----------------|
|                                             |               | Yes               |       | No  |       |                |
|                                             |               | No                | %     | No  | %     |                |
| Presence of active strategy against smoking | Yes           | 346               | 21.8% | 528 | 38.9% | 0.000          |
|                                             | No            | 986               | 62.2% | 575 | 42.3% |                |
|                                             | I do not know | 252               | 15.9% | 256 | 18.8% |                |
| Government put smoking prevention policy    | Yes           | 277               | 17.5% | 417 | 30.7% | 0.000          |
|                                             | No            | 1228              | 77.5% | 824 | 60.7% |                |
|                                             | I do not know | 80                | 5.0%  | 117 | 8.6%  |                |
| Smoking prevention initiative is effective  | Yes           | 288               | 18.2% | 346 | 25.5% | 0.000          |
|                                             | No            | 1069              | 67.5% | 766 | 56.4% |                |
|                                             | I do not know | 227               | 14.3% | 245 | 18.1% |                |
| Feel a lot of efforts to prevent smoking    | Yes           | 351               | 22.2% | 384 | 28.3% | 0.000          |
|                                             | No            | 1119              | 70.7% | 823 | 60.7% |                |
|                                             | I do not know | 113               | 7.1%  | 149 | 11.0% |                |

Smoker think there is no active strategy against smoking 62%. There is no governmental policy against smoking 77.3%, the smoking prevention initiative is not effective 67.5% and there is no lot of effort for prevent smoking 70.7%.

respectively) knew that there are places in which smoking is prohibited, but there are no effective warnings about smoking in schools; cafes and hospitals are the only places where there are warnings. Sinha et al.<sup>17</sup> found that 80% of participants favoured a ban on smoking in public places. More smokers (60.2%) than non-smokers (39.6%) did not know that smoking is prohibited in work-places, implying greater exposure to environmental smoke. Moher et al.<sup>19</sup> found that tobacco bans decreased cigarette consumption during the working day, but their effect on total consumption was less certain, and evidence is lacking about the cost-effectiveness of work-place programmes. Interventions for individual smokers were found to increase the likelihood of their quitting smoking. These include advice from a health professional, individual and group counselling and pharmacological treatment to overcome nicotine addiction. Self-help interventions are less effective. Interventions are effective whether offered in the work-place or elsewhere. Although smokers who take up these interventions are more likely to stop, the absolute numbers that quit are low. In our study, 64.6% of smokers considered that there is no effective help for

quitting, 60.6% that there is no encouragement to quit, 59.6% that the treatment offered for quitting is expensive and 54.7% that there is no system for quality assurance of the health services provided for smokers.

The findings of this study show that knowledge that selling cigarettes to children is illegal and about the hazards of smoking was better among smokers and that their attitude to the elements of the FCTC was positive, but they considered that not enough was being done to prevent tobacco use. The findings could be used as a baseline for future evaluation of the tobacco control programmes implemented by the Ministry of Health in Egypt (Table 2).

In order to reduce the access of children and adolescents to cigarettes, the prohibition on selling cigarettes should be enforced and the price increased through excise taxes. The warning signs on cigarette boxes should be effective before the cigarettes are bought and not after. Anti-smoking television advertising should be transmitted routinely. The rights of non-smokers to clean air supersede the right of smokers to smoke; therefore, the prohibition on smoking in public places should be enforced to

**Table 6: Practices to decrease smoking (community help).**

|                                                                   |               | Smoking condition |       |     |       | <i>P</i> value |
|-------------------------------------------------------------------|---------------|-------------------|-------|-----|-------|----------------|
|                                                                   |               | Yes               |       | No  |       |                |
|                                                                   |               | No                | %     | No  | %     |                |
| There is a lot of interested people working in smoking prevention | Yes           | 416               | 26.3% | 444 | 32.7% | 0.000          |
|                                                                   | No            | 796               | 50.3% | 605 | 44.5% |                |
|                                                                   | I do not know | 371               | 23.4% | 310 | 22.8% |                |
| Doctors help smoking prevention policy                            | Yes           | 877               | 55.4% | 806 | 59.3% | 0.000          |
|                                                                   | No            | 654               | 41.3% | 461 | 33.9% |                |
|                                                                   | I do not know | 53                | 3.3%  | 92  | 6.8%  |                |
| Nurses help smoking prevention policy                             | Yes           | 816               | 51.5% | 767 | 56.4% | 0.000          |
|                                                                   | No            | 682               | 43.0% | 484 | 35.6% |                |
|                                                                   | I do not know | 87                | 5.5%  | 108 | 7.9%  |                |

Smokers think that there is no interested people in the community working in smoking prevention 50.4%, medical personnel help the smoking prevention policy more than 50% agreement among the smokers.

**Table 7: Practices to decrease smoking (smoking laws).**

|                                                           |               | Smoking condition |       |      |       | P value |
|-----------------------------------------------------------|---------------|-------------------|-------|------|-------|---------|
|                                                           |               | Yes               |       | No   |       |         |
|                                                           |               | No                | %     | No   | %     |         |
| Smoking prevention laws done                              | Yes           | 125               | 7.9%  | 120  | 8.8%  | 0.005   |
|                                                           | No            | 1303              | 82.3% | 1058 | 77.8% |         |
|                                                           | I do not know | 156               | 9.8%  | 182  | 13.4% |         |
| Generally there are places where smoking prohibited       | Yes           | 1215              | 76.7% | 1048 | 77.1% | 0.000   |
|                                                           | No            | 317               | 20.0% | 206  | 15.1% |         |
|                                                           | I do not know | 53                | 3.3%  | 106  | 7.8%  |         |
| Effective warning for smoking prevention in schools       | Yes           | 679               | 42.9% | 842  | 62.0% | 0.000   |
|                                                           | No            | 846               | 53.4% | 453  | 33.4% |         |
|                                                           | I do not know | 59                | 3.7%  | 63   | 4.6%  |         |
| Effective warning for smoking prevention in work places   | Yes           | 595               | 37.6% | 733  | 53.9% | 0.000   |
|                                                           | No            | 954               | 60.2% | 538  | 39.6% |         |
|                                                           | I do not know | 35                | 2.2%  | 89   | 6.5%  |         |
| Effective warning for smoking prevention in public places | Yes           | 755               | 47.6% | 634  | 46.7% | 0.000   |
|                                                           | No            | 794               | 50.1% | 627  | 46.1% |         |
|                                                           | I do not know | 36                | 2.3%  | 98   | 7.2%  |         |
| Effective warning for smoking prevention in hospitals     | Yes           | 1207              | 76.2% | 1148 | 84.5% | 0.000   |
|                                                           | No            | 358               | 22.6% | 190  | 14.0% |         |
|                                                           | I do not know | 19                | 1.2%  | 21   | 1.5%  |         |
| Effective warning for smoking prevention in coffee        | Yes           | 27                | 1.7%  | 53   | 3.9%  | 0.000   |
|                                                           | No            | 1534              | 96.8% | 1204 | 88.5% |         |
|                                                           | I do not know | 23                | 1.5%  | 103  | 7.6%  |         |

There are places where smoking is prohibited 76.7%, there is no effective warning from smoking prevention in schools, public places, coffee and the only places where there is effective warning is hospitals.

**Table 8: Quitting help in the community.**

|                                                                         |               | Smoking condition |       |     |       | P value |
|-------------------------------------------------------------------------|---------------|-------------------|-------|-----|-------|---------|
|                                                                         |               | Yes               |       | No  |       |         |
|                                                                         |               | No                | %     | No  | %     |         |
| Effective help to quit                                                  | Yes           | 369               | 45.0% | 451 | 55.0% | 0.000   |
|                                                                         | No            | 1035              | 64.6% | 568 | 35.4% |         |
|                                                                         | I do not know | 180               | 34.7% | 339 | 65.3% |         |
| Great efforts to encourage smokers to use effective ways for quit       | Yes           | 143               | 36.2% | 252 | 63.8% | 0.000   |
|                                                                         | No            | 1250              | 60.6% | 813 | 39.4% |         |
|                                                                         | I do not know | 191               | 39.5% | 293 | 60.5% |         |
| Treatment offered for smokers to quit expensive                         | Yes           | 351               | 59.6% | 238 | 40.4% | 0.000   |
|                                                                         | No            | 225               | 43.0% | 298 | 57.0% |         |
|                                                                         | I do not know | 1009              | 55.0% | 824 | 45.0% |         |
| System for quality insurance in the health services provide for smokers | Yes           | 119               | 43.6% | 154 | 56.4% | 0.000   |
|                                                                         | No            | 884               | 54.7% | 732 | 45.3% |         |
|                                                                         | I do not know | 582               | 55.2% | 472 | 44.8% |         |

Smokers think that there is no effective help for quit 64.6%, there is no efforts for encourage quit 60.6%, treatment offered for quit is expensive 59.6% and there is no system for quality insurance in health services provide for smokers 54.7%.

protect the environment from exposure to tobacco smoke. Interventions to decrease tobacco use among smokers and especially the young (e.g. increasing excise taxes, media campaigns, school programmes, community interventions and reduced access of minors to tobacco) must be broad-based, focused on boys and girls, and have components directed towards initiation, prevention and cessation. If effective programmes are not developed and implemented soon, the morbidity and mortality attributable to tobacco will increase. The Government of Egypt must consider new, stronger provisions and strong enforcement measures. Synergy among countries in tobacco control laws

and regulations by ratifying and complying with the WHO FCTC can be helpful to each country (Tables 3–8).

### Conflict of interest

The authors have no conflict of interest to declare.

### References

1. Roemer R, Taylor A, Lariviere J. Origins of the WHO framework convention on tobacco control. *J Inf* 2005; 95: 936–938.

2. Taylor AL. Making the World Health Organization work: a legal framework for universal access to the conditions for health. *Am J Law Med* 1992; 18: 301.
3. Taylor AL. An international regulatory strategy for global tobacco control. *Yale J Int Law* 1996; 21: 257.
4. Taylor AL, Roemer R. *International strategy for tobacco control 1996*. Geneva: World Health Organization; 1996.
5. Nassar H. *The economics of tobacco in Egypt: a new analysis of demand*; 2003. HNP Discussion Paper, Economics of Tobacco Control Paper No. 8, March 2003.
6. Mohamed MK, Loffredo C, Israel E. *The health hazards of smoking shisha Egyptian smoking*. Geneva: World Health Organization; 2006 (WHO-EM/TFI/026-E-05-06-2006).
7. Gadalla S, Aboul-Fotouh A, El-Setouhy M, Mikhail N, Abdel-Aziz F. Prevalence of smoking among rural secondary school students in Qualyobia governorate. *J Egypt Soc Parasitol* 2003; 33(Suppl. 3): 1031.
8. *WHO report on the global tobacco epidemic, 2008: the MPO-WER package*. Geneva: World Health Organization; 2008. p. 268–287.
9. Sinha DN, Reddy KS, Rahman K, Warren CW, Jones NR, Asma S. Linking Global Youth Tobacco Survey (GYTS) data to the WHO framework convention on tobacco control: the case for India. *Indian J Public Health* 2006; 50: 76.
10. Gilmore J. *Report on smoking in Canada, 1985 to 2001*. Ottawa: Statistics Canada; 2002.
11. Kahende J, Teplinskaya A, Malarcher A, Husten C, Maurice E. State-specific prevalence of cigarette smoking among adults and quitting among persons aged 18–35 years—United States, 2006. *Morb Mortal Wkly Rep* 2007; 56: 993–996.
12. Bala M, Strzeszynski L, Cahill K. Mass media interventions for smoking cessation in adults. *Cochrane Database Syst Rev*; 2008. Update in Cochrane Database Syst Rev. 2013;6:CD004704. BACKGROUND.
13. McVey D, Stapleton J. Can anti-smoking television advertising affect smoking behaviour? Controlled trial of the Health Education Authority for England's anti-smoking TV campaign. *Tob Control* 2000; 9: 273–282.
14. Centers for Disease Control and Prevention. 2009 state cigarette excise taxes—United States. *Morb Mortal Wkly Rep* 2010; 59: 385–388.
15. Forster JL, Widome R, Bernat DH. Policy interventions and surveillance as strategies to prevent tobacco use in adolescents and young adults. *Am J Prev Med* 2007; 33: S335–S339.
16. Van Walbeek C. Tobacco control in South Africa. *Promot Educ* 2005;(Suppl. 4). 25–28, 57.
17. Sinha DN, Gewaifel G, Pandey MR, Khan SA, Gunasekara PW, El-Awa F, Warren CW, Jones NR. Linking Global Youth Tobacco Survey 2003 and 2006 data to tobacco control policy in India. *J Sch Health* 2008; 78: 368–373.
18. Reddy KS. Linking India global health professions student survey data to the World Health Organization framework convention on tobacco control. *Indian J Cancer* 2010; 47: 30.
19. Moher M, Hey K, Lancaster T. Workplace interventions for smoking cessation. Cochrane Library 2003 *Cochrane Database Syst Rev* 2005;(2): CD003440.
